# Supplementary material for: Estimation of Spring Maize Evapotranspiration in Semi-Arid Regions of Northeast China Using Machine Learning: An Improved SVR Model Based on PSO and RF Algorithms
Source: MDPI journal article supplement (doi:10.3390/w15081503), 2023-04-12
Supplement: s1 [file s1]

Archive with 1 entries (1 files):
- water-2265261-supplementary.pdf
